# Supplementary material
Source: HighWire-hosted journal article supplement (https://jnm.snmjournals.org/highwire/filestream/95263/field_highwire_adjunct_files/0/203539_Supplemental_Data.pdf)
Supplement: 203539_Supplemental_Data.pdf [file 203539_Supplemental_Data.pdf]

Supplemental Table 1: Standard operation procedures (SOP) used for PSMA-TAT

|                                     | Initial SOP, active during therapy of the reported patients                                                                                                             | Modified SOP , to be used for future patients                                                                                                                                                 |
|-------------------------------------|-------------------------------------------------------------------------------------------------------------------------------------------------------------------------|-----------------------------------------------------------------------------------------------------------------------------------------------------------------------------------------------|
| Definition of "PSMA-positive"       | Visual analysis: average tumor-uptake > liver uptake                                                                                                                    | Visual analysis: average tumor-uptake > liver uptake<br>AND uptake of at least one lesions > salivary glands                                                                                  |
| Intended / maximum number of cycles | 3 / up to 5 (physicians choice)                                                                                                                                         | 3 / up to 5 (physicians choice)                                                                                                                                                               |
| Treatment interval (rationale)      | every 2 months<br>(restricted by availability of <sup>225</sup> Ac)                                                                                                     | every 2 months<br>(restricted by availability of <sup>225</sup> Ac)                                                                                                                           |
| Treatment activity (rationale)      | Cycle 1-3: 100 kBq/kg body-weight<br>(dosimetry estimate and empirical data; Ref. 17,19)                                                                                | Cycle 1: fixed activity of 8 MBq;<br>Cycle 2-3: consider dose reduction of 2 MBq,<br>if decline of PSA is >60% in the preceding cycle<br>(clinical experience with these first n=40 patients) |
| Co-Medication prescribed            | Day 0: 2000ml i.v. hydration with electrolyte solution<br>Day 1: HCT 12.5mg<br>Day 1-2: 2000ml oral hydration<br>Day 1-3: anticoagulation<br>Day 1-5: dexamethasone 2mg |                                                                                                                                                                                               |
| Co-Medication allowed               | GnRH-analogues or GnRH-antagonists<br>Bisphosphonate (administered >3 days remote to PSMA-RLT)<br>Analgesics<br>All drugs related to benign co-morbidity                |                                                                                                                                                                                               |
| Co-Medication discontinued          | Cabazitaxel, Docetaxel, other i.v. chemotherapy: >3 weeks in advance of PSMA-TAT<br>oral chemotherapy, abiraterone, enzalutamide: until day 0                           |                                                                                                                                                                                               |
| Follow-up markers                   | PSA, ALP                                                                                                                                                                | PSA, ALP, LDH, NSE or Chr.-A                                                                                                                                                                  |
| Safety lab                          | blood-cell-count, liver enzymes, creatinine/BUN, electrolytes                                                                                                           |                                                                                                                                                                                               |

PSA prostate-specific antigen, ALP alkaline phosphatase, LDH lactate-dehydrogenases, NSE neuron-specific enolases, Chr.-A Chromogranine-A, BUN blood urea nitrogen, GnRH gonadotropin releasing hormone
